# Supplementary material for: Combination of IAP Antagonists and TNF-α-Armed Oncolytic Viruses Induce Tumor Vascular Shutdown and Tumor Regression
Source: PubMed Central journal article supplement — Mol Ther Oncolytics. 2018 Jun 21;10:28–39. doi: 10.1016/j.omto.2018.06.002 (PMC6076221; doi:10.1016/j.omto.2018.06.002), 2018-06-21
Supplement: mmc1.pdf [file mmc1.pdf]

**OMTO, Volume 10**

**Supplemental Information**

**Combination of IAP Antagonists and  
TNF- $\alpha$ -Armed Oncolytic Viruses Induce Tumor  
Vascular Shutdown and Tumor Regression**

**Shawn T. Beug, Stephanie J. Pichette, Martine St-Jean, Janelle Holbrook, Danielle E. Walker, Eric C. LaCasse, and Robert G. Korneluk**

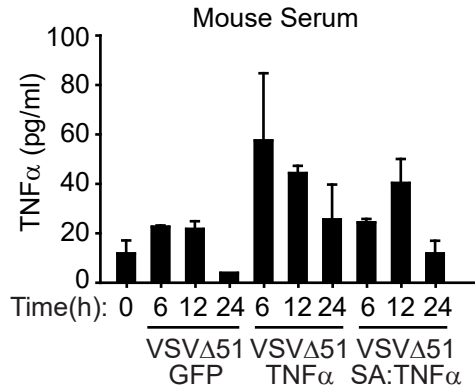

**Figure S1.** Expression of endogenous TNF $\alpha$  from mice infected with TNF $\alpha$ -armed oncolytic VSV. Mouse TNF $\alpha$  was quantitated by ELISA from the serum of mice that were treated with  $1 \times 10^7$  PFU of the indicated virus for 6, 12 or 24 h. Mean, SEM.

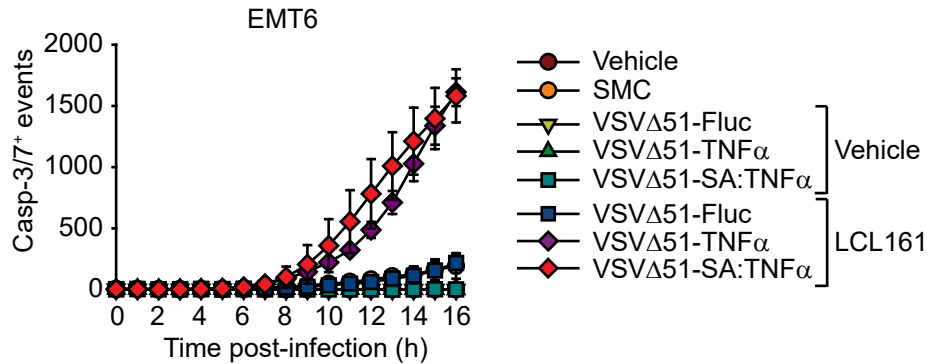

**Figure S2.** SMC treated cancer cells are killed at a faster rate with infection by TNF $\alpha$ -armed oncolytic VSV. Enumeration of DEVD-FITC signals from EMT6 cells treated with vehicle or 5  $\mu$ M of the SMC LCL161 and PBS or 1 MOI of the indicated virus. Images were collected over 16 h using a time-lapse microscope and quantitated using the IncucyteZoom software. Mean, SEM.

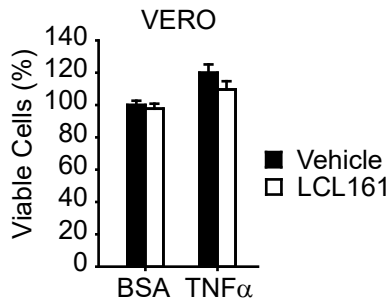

**Figure S3.** Vero cells are resistant to SMC-mediated and TNF $\alpha$ -induced cell death. Alamar Blue assays of Vero cells treated with vehicle or 5  $\mu$ M of the SMC LCL161 and 0.01% BSA or 10  $\mu$ g/ml TNF $\alpha$  for 48 h. Mean, SD.

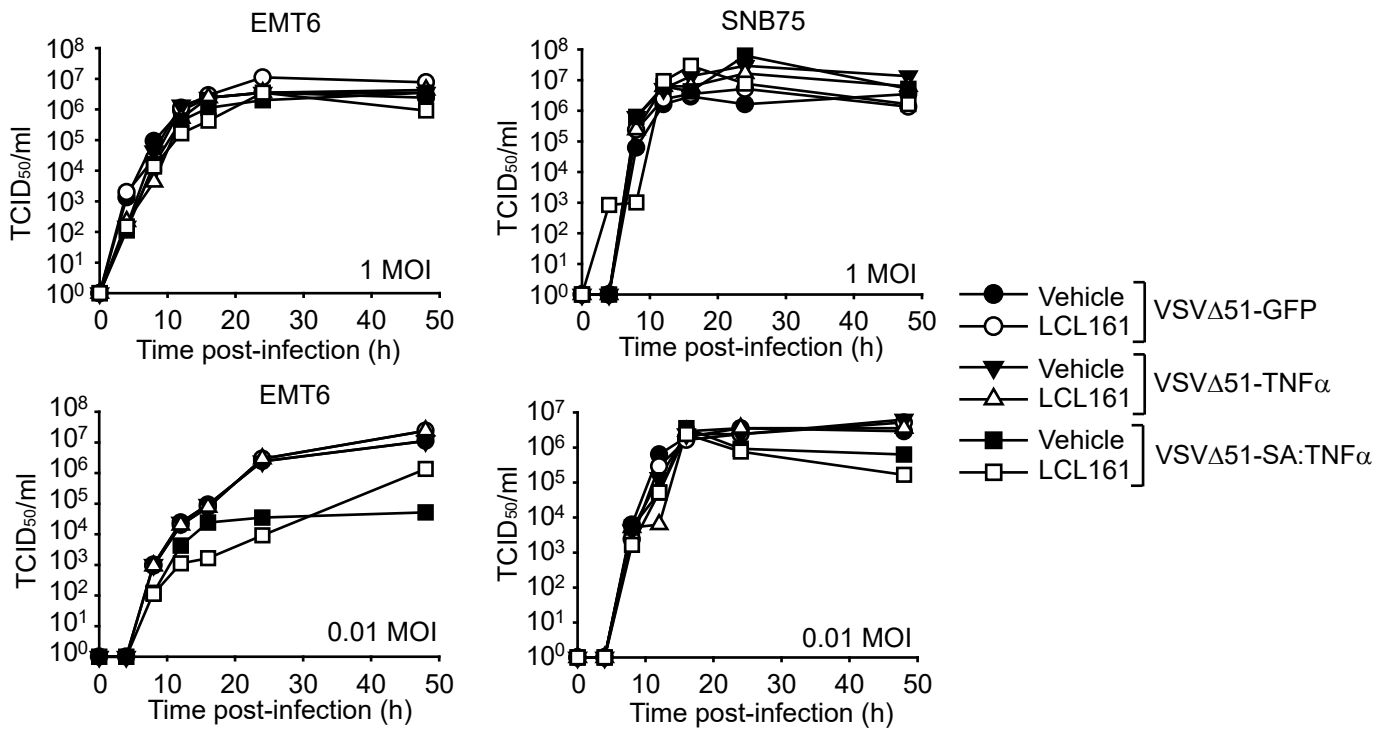

**Figure S4. SMC treatment does not alter the kinetics of TNF $\alpha$ -armed oncolytic VSV.**

EMT6 and SNB75 cells were treated with vehicle or 5  $\mu$ M of the SMC LCL161 and infected with 1 or 0.01 MOI and the supernatant was collected at the indicated times for quantitation of the virus titer using BHK-21 or Vero cells for 48 h, respectively. Dead cells were scored to determine the TCID<sub>50</sub>/mL.

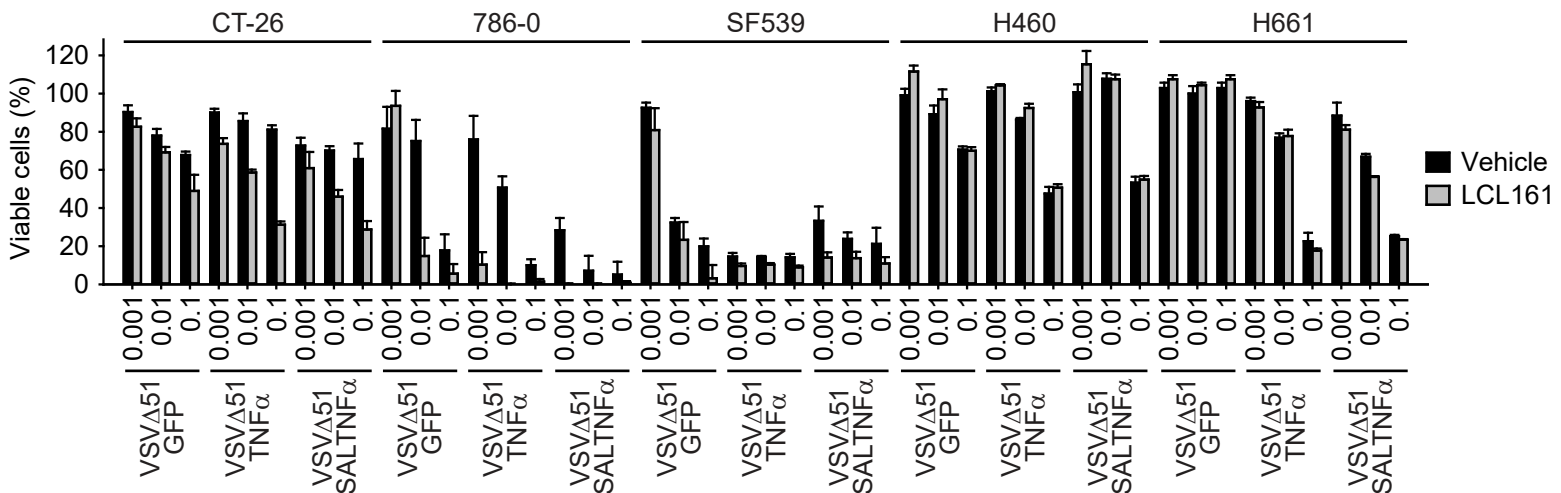

**Figure S5. Responsiveness of a SMC sensitive and resistant cell lines to the combination of SMC and TNF $\alpha$ -armed oncolytic VSV.**

Alamar blue viability assays of mouse (CT-26) and human (786-0, SF539, H460, H661) cancer cells treated with vehicle or 5  $\mu$ M of the SMC LCL161 and increasing MOI of the indicated virus for 48 h. Mean, SD.

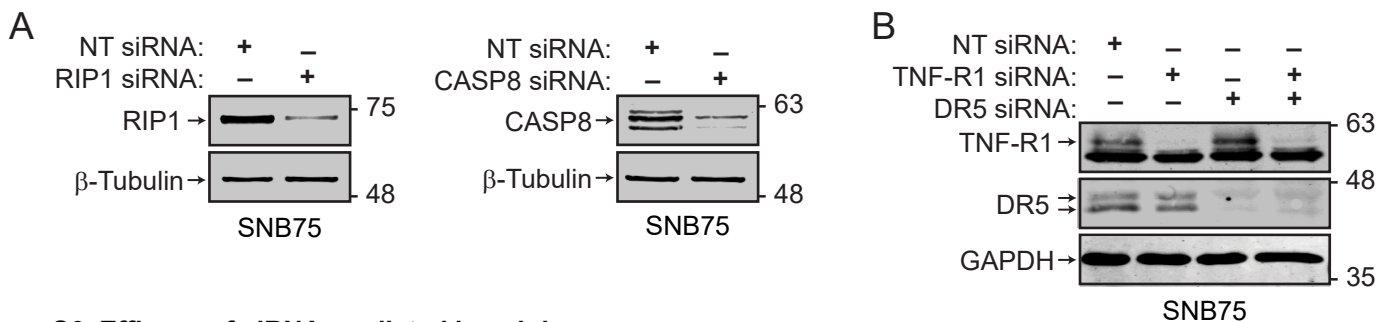

**Figure S6. Efficacy of siRNA-mediated knockdown.**

SNB75 cells were transfected with combinations of non-targeting (NT), RIP1, CASP8, TNF-R1 or DR5 siRNA for 48 h. Equal amounts of soluble protein were separated on polyacrylamide gels followed by transfer to nitrocellulose membranes and probed with the indicated antibodies.
